# Supplementary material for: Association between ambient air pollutants and preterm birth in Ningbo, China: a time-series study
Source: Springer Nature journal article supplement (doi:10.1186/s12887-018-1282-9), 2018-09-20
Supplement: MOESM1 [file 16139920]

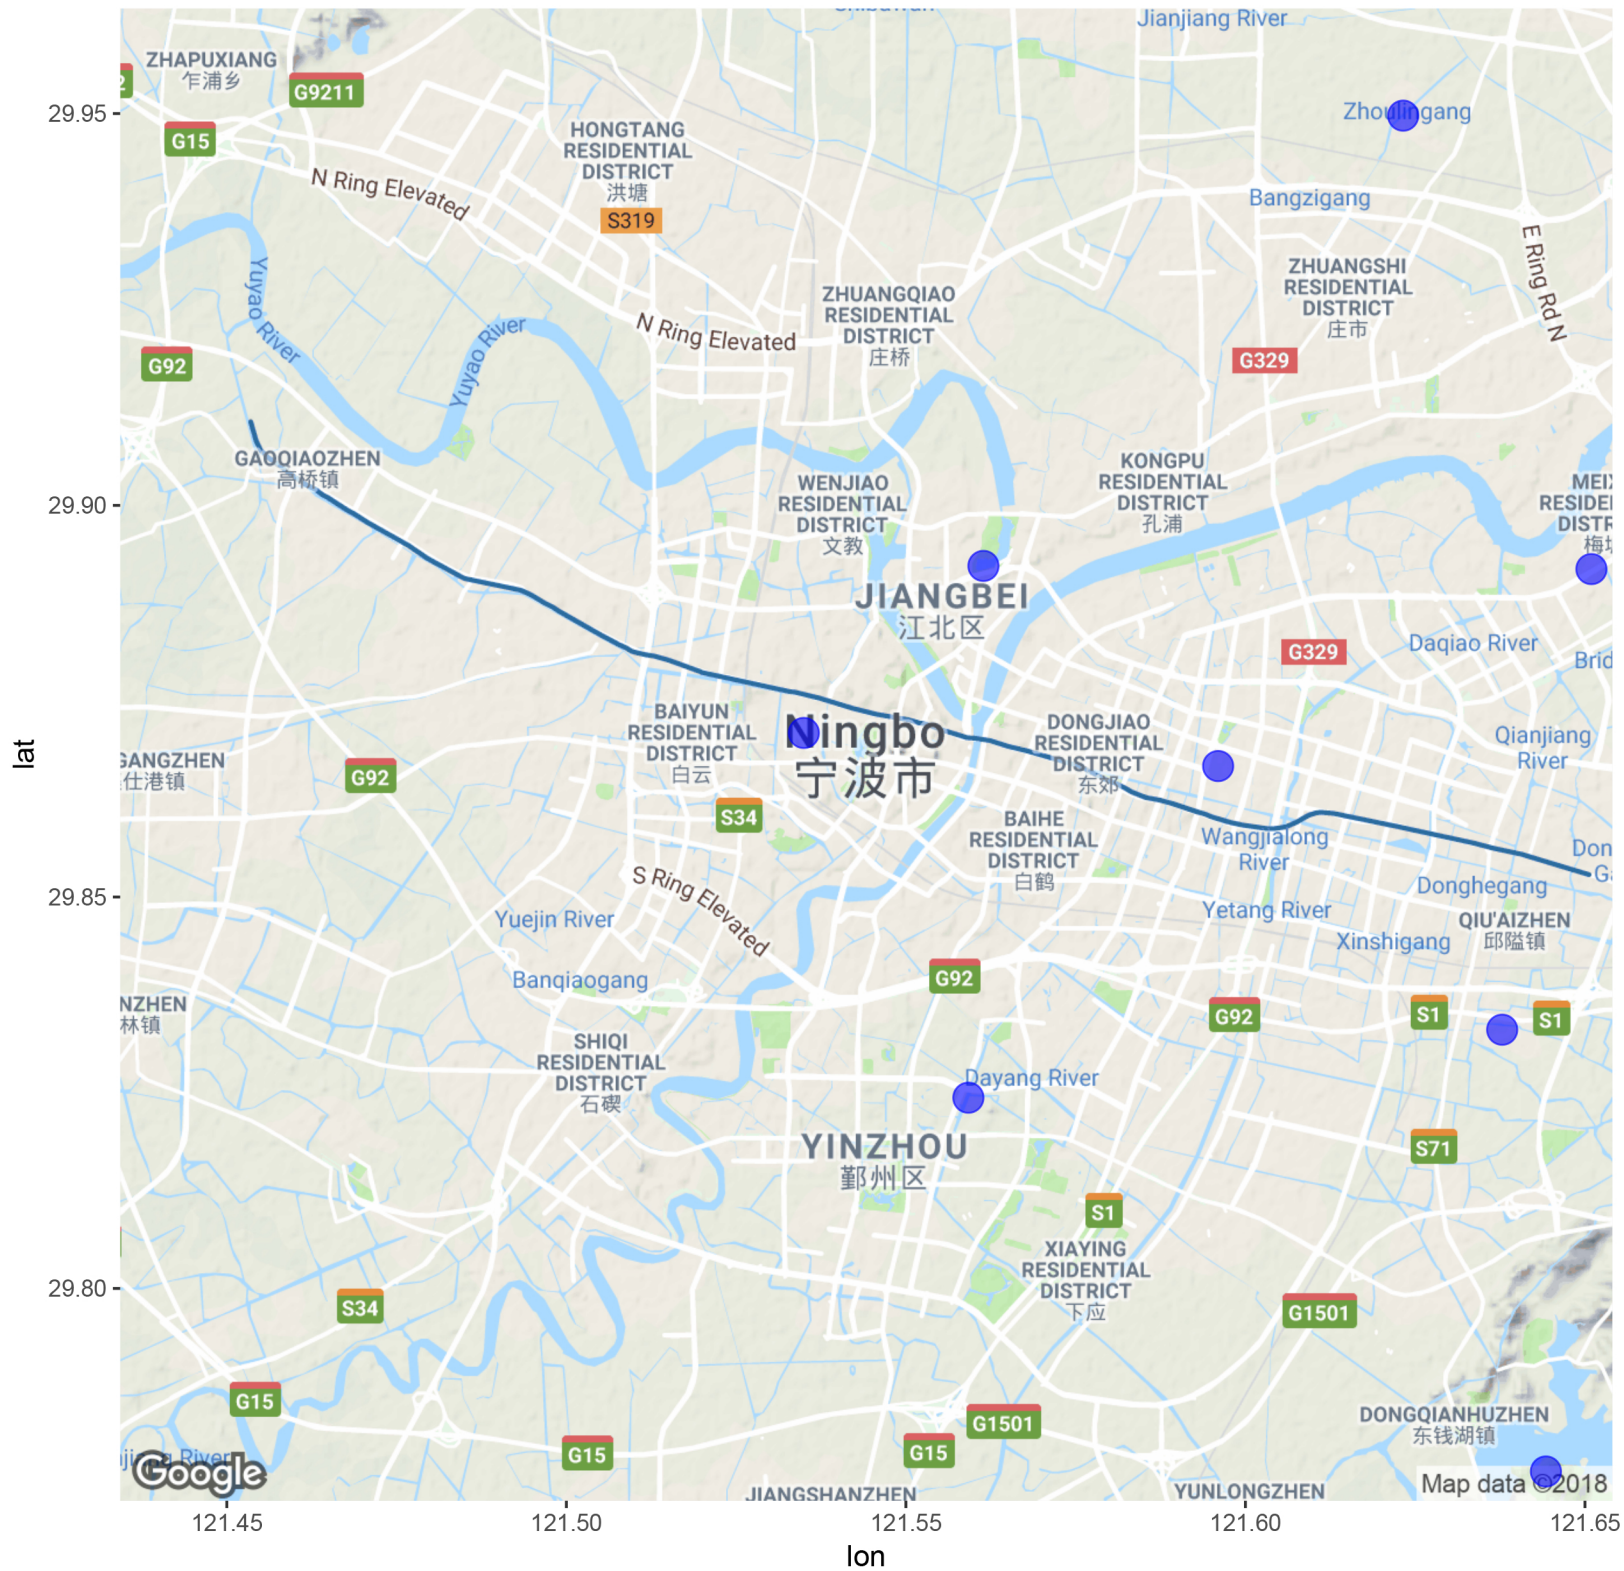

Supplemental Fig 1. Location of air quality monitor stations in Ningbo city
